# Supplementary material for: Structural basis of Stu2 recruitment to yeast kinetochores
Source: eLife journal article supplement (doi:10.7554/elife.65389), 2021-02-16
Supplement: supp [file elife-65389-supp-v1.zip]

Archive with 16 entries (16 files):
- elife_poa_e65389_Transparent_Reporting_File.pdf
- elife_poa_e65389_Figure_3_figure_supplement_1.tif
- elife_poa_e65389_Figure_3_figure_supplement_2.tif
- elife_poa_e65389_Figure_3_figure_supplement_3.tif
- elife_poa_e65389_Figure_3_figure_supplement_4.tif
- elife_poa_e65389_Figure_3_figure_supplement_5.tif
- elife_poa_e65389_Figure_4_figure_supplement_1.tif
- elife_poa_e65389_Figure_4_figure_supplement_2.tif
- elife_poa_e65389_Figure_4_figure_supplement_3.tif
- elife_poa_e65389_Figure_4_figure_supplement_4.tif
- elife_poa_e65389_Figure_4_figure_supplement_5.tif
- elife_poa_e65389_Figure_4_figure_supplement_6.tif
- elife_poa_e65389_Figure_4_figure_supplement_7.tif
- elife_poa_e65389_Supplementary_file_1.docx
- elife_poa_e65389_Supplementary_file_2.xlsx
- elife_poa_e65389_Supplementary_file_3.docx
