# Supplementary material for: Structural basis of Stu2 recruitment to yeast kinetochores
Source: eLife journal article supplement (doi:10.7554/elife.65389), 2021-02-16
Supplement: supp [file elife-65389-supp-v1.zip › elife_poa_e65389_Supplementary_file_2.xlsx]

## Sheet: Sheet1
Supplementary File 2. Plasmids and Primers used in this study. All pM plasmids (except pM646) are derivatives of pM225.
Plasmid	Primers used to generate plasmids (5' to 3'):
pM225 (pSTU2-STU2-3V5, i.e. STU2WT)	described in (Miller et al 2019)	GATCGATCgggcccTAGTACAATTTCTAATGGGC
	see above	GATCGATCctcgagTTATGGATCTGTACTATCCAGTCC
pM267 (pSTU2-stu2(∆855-888)-3V5, i.e. stu2C-term∆(855-888))	see above	AGTGAACCCAATAGGGTCAG
	see above	cctggatccactagttctagagcggccgcGGCAAAACTATCGTTGAAATCGATATCCAAATC
pM488 (pSTU2-STU2-GFP, i.e. STU2WT-GFP)	SB3988	GAAAAAATGAAGGCCAAATCAAGGCGGGAAGGGACAACCAGGACGcggatccccgggttaattaa
	SB5918	cgataccgtcgaccacctgccttgctccctcgagTTATTTGTATAGTTCATCCATGCC
pM544 (pSTU2-stu2(M876E I873E L869E)-3V5, i.e. stu2EEE)	oMM119	GCAGTGACATCTACCGAAAAGGCCAGAGAGGAAAAAGAGAAGGCCAAATCAAGGCGGG
	oMM2	tatcgcactcacgtaaacac
pM543 (pSTU2-stu2(M876A I873A L869A)-3V5, i.e. stu2AAA)	oMM142	GCAGTGACATCTACCGCAAAGGCCAGAGCTGAAAAAGCGAAGGCCAAATCAAGGCGGG
	oMM2	tatcgcactcacgtaaacac
pM531 (pSTU2-STU2-FRB, i.e. STU2-FRB)	oMM20	AATGAAGGCCAAATCAAGGCGGGAAGGGACAACCAGGACGcggatccccgggttaattaa
	oMM127	GTATAGGTTTACCTGGATCCACTAGTTCTAGAGCGGCCGCctcgagctttgagattcgt
pM532 (pSTU2-stu2(M876E I873E L869E)-3V5, i.e. stu2EEE-FRB)	oMM20	AATGAAGGCCAAATCAAGGCGGGAAGGGACAACCAGGACGcggatccccgggttaattaa
	oMM127	GTATAGGTTTACCTGGATCCACTAGTTCTAGAGCGGCCGCctcgagctttgagattcgt
pM579 (pSTU2-stu2(L869E)-3V5, i.e. stu2L869E)	oMM96	GTTATAAACGTGCCGCTGCAGTGACATCTACCGAAAAGGCCAGAATTGAAAAAATGAAGG
	oMM2	tatcgcactcacgtaaacac
pM578 (pSTU2-stu2(I873E)-3V5, i.e. stu2I873E)	oMM93	GCCGCTGCAGTGACATCTACCCTAAAGGCCAGAGAGGAAAAAATGAAGGCCAAATCAAGG
	oMM2	tatcgcactcacgtaaacac
pM545 (pSTU2-stu2(M876E)-3V5, i.e. stu2M876E)	oMM97	GTGACATCTACCCTAAAGGCCAGAATTGAAAAAGAGAAGGCCAAATCAAGGCGGGAAGG
	oMM2	tatcgcactcacgtaaacac
pM577 (pSTU2-stu2(L869A)-3V5, i.e. stu2L869A)	oMM141	GTTATAAACGTGCCGCTGCAGTGACATCTACCGCAAAGGCCAGAATTGAAAAAATGAAGG
	oMM2	tatcgcactcacgtaaacac
pM576 (pSTU2-stu2(I873A)-3V5, i.e. stu2I873A)	oMM140	GCCGCTGCAGTGACATCTACCCTAAAGGCCAGAGCTGAAAAAATGAAGGCCAAATCAAGG
	oMM2	tatcgcactcacgtaaacac
pM575 (pSTU2-stu2(M876A)-3V5, i.e. stu2M876A)	oMM139	GTGACATCTACCCTAAAGGCCAGAATTGAAAAAGCGAAGGCCAAATCAAGGCGGGAAGG
	oMM2	tatcgcactcacgtaaacac
pM558 (pSTU2-stu2(∆855-888)-FRB, i.e. stu2C-term∆(855-888)-FRB)	oMM163	CGACGATTTGGATATCGATTTCAACGATAGTTTTGCCCGGATCCCCGGGTTAATTAAC
	oMM127	GTATAGGTTTACCTGGATCCACTAGTTCTAGAGCGGCCGCctcgagctttgagattcgt
pM587 (pSTU2-stu2(∆855-888)-GFP, i.e. STU2C-term∆(855-888)-GFP)	oMM208	cctttactgttaattaacccggggatccgGGCAAAACTATCGTTGAAATCGATATCCAA
	oMM2	tatcgcactcacgtaaacac
pM588 (pSTU2-stu2(M876E I873E L869E)-GFP, i.e. STU2EEE-GFP)	oMM119	GCAGTGACATCTACCGAAAAGGCCAGAGAGGAAAAAGAGAAGGCCAAATCAAGGCGGG
	oMM2	tatcgcactcacgtaaacac
pM646 (pSPC110-SPC110-mCherry:URA3) (single integraton at URA3 locus)	oMM239	gaatgcacacggtgtggtgggcccaaataccCTTCTATGTTTGGTTTAGAAGAACACGAG
	oMM240	cgaattcgcgtcgaccacctgccttgctcccctacttgtacagctcgtccatgccgccgg
pETduet(ndc80(∆1-55)(NT-6His))/full-lengh nuf2)	Described (Wei et al 2005)
pRSFduet(full-length untagged spc24/full-length untagged spc25)	Described (Wei et al 2005)
pETduet(Ndc80(NT-6His)(∆1-55)(∆4))/untagged Nuf2(∆4)	Described in (Valverde et al 2016)
pRSFduet(untagged spc24(∆c)/untagged spc25(∆c))	Described in (Valverde et al 2016)
pLicHis-tev(stu2 655-755-GGS6-stu2 855-888)		acctgtacttccaatccaatGACAAGAATGAGAAACTGATC
		atccgttatccacttccaatTTATTAAGTGCGTGTCGTTC
pLicHis-tev(stu2 655-755-GGS6-stu2 855-888-L869A)		acctgtacttccaatccaatGACAAGAATGAGAAACTGATC
		atccgttatccacttccaatTTATTAAGTGCGTGTCGTTC
pLicHis-tev(stu2 655-755-GGS6-stu2 855-888-L869A)		gcgcagccgctgtgacatctaccgcgaaagcgcgtattgagaaaatgaaggcg
		cgccttcattttctcaatacgcgctttcGCggtagatgtcacagcggctgcgc
pLicHis-tev(stu2 655-755-GGS6-stu2 855-888-I873A)		gtgacatctaccctgaaagcgcgtGCGgagaaaatgaaggcgaagtcccgc
		gcgggacttcgccttcattttctcCGCacgcgctttcagggtagatgtcac
pLicHis-tev(stu2 655-755-GGS6-stu2 855-888-M876A)		ctcacggcgggacttcgccttCGCtttctcaatacgcgctttcagg
		cctgaaagcgcgtattgagaaaGATaaggcgaagtcccgccgtgag
