# Supplementary figures and images for: Structural basis of Stu2 recruitment to yeast kinetochores
Source: eLife journal article supplement (doi:10.7554/elife.65389), 2021-02-16

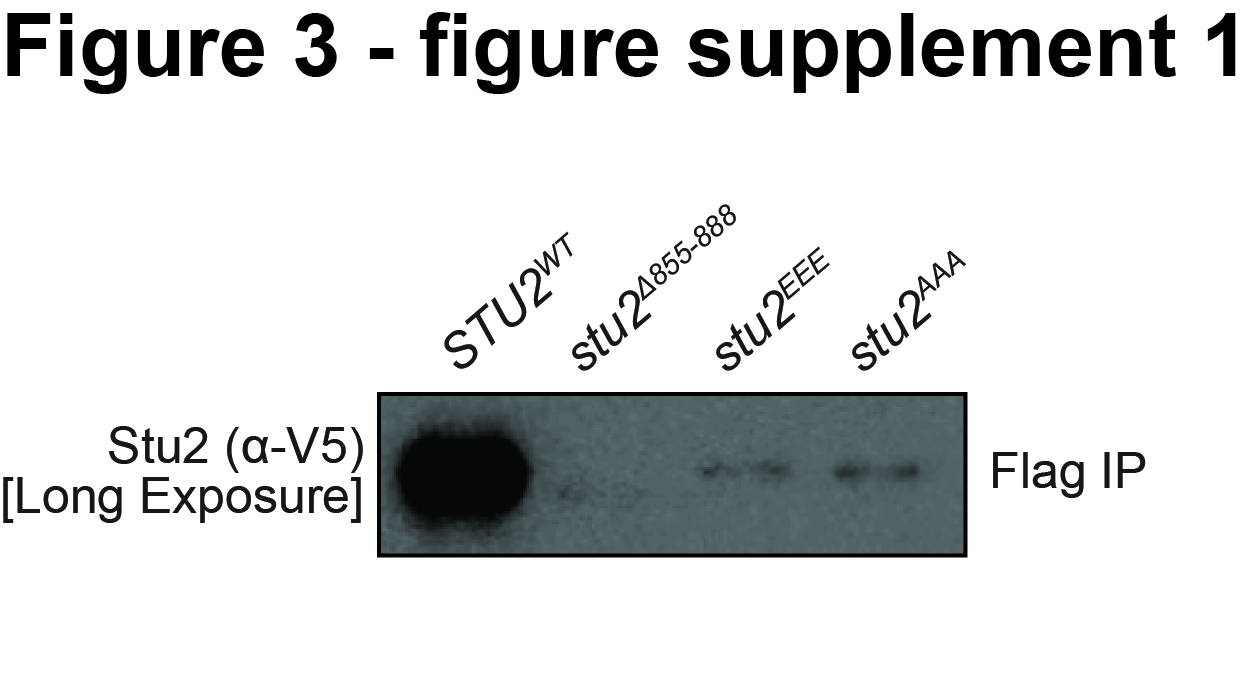

Supplement: supp [file elife-65389-supp-v1.zip › elife_poa_e65389_Figure_3_figure_supplement_1.tif]

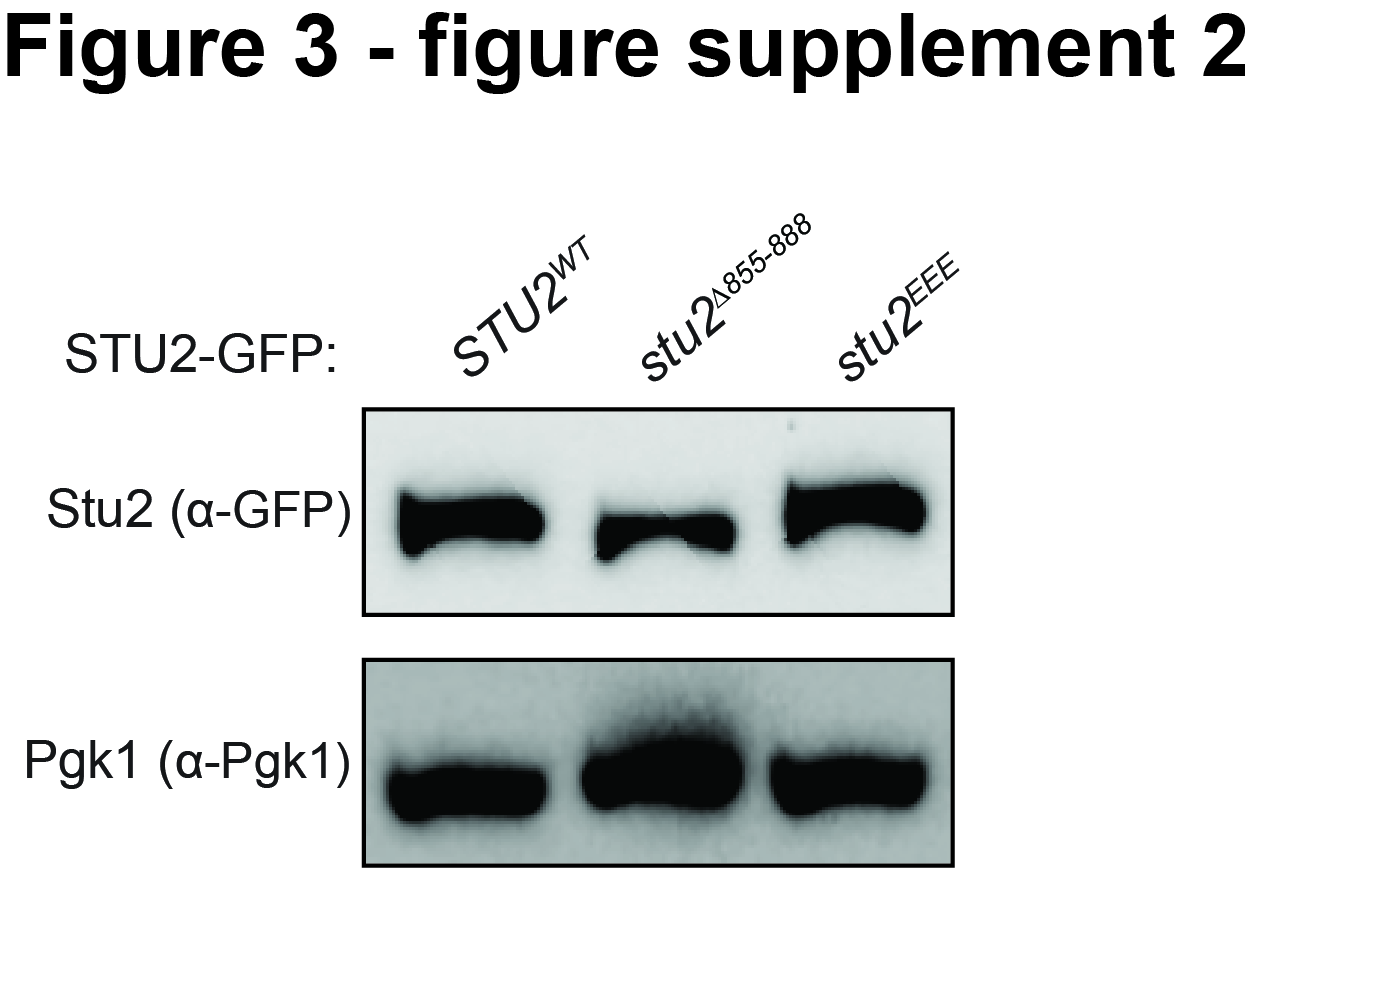

Supplement: supp [file elife-65389-supp-v1.zip › elife_poa_e65389_Figure_3_figure_supplement_2.tif]

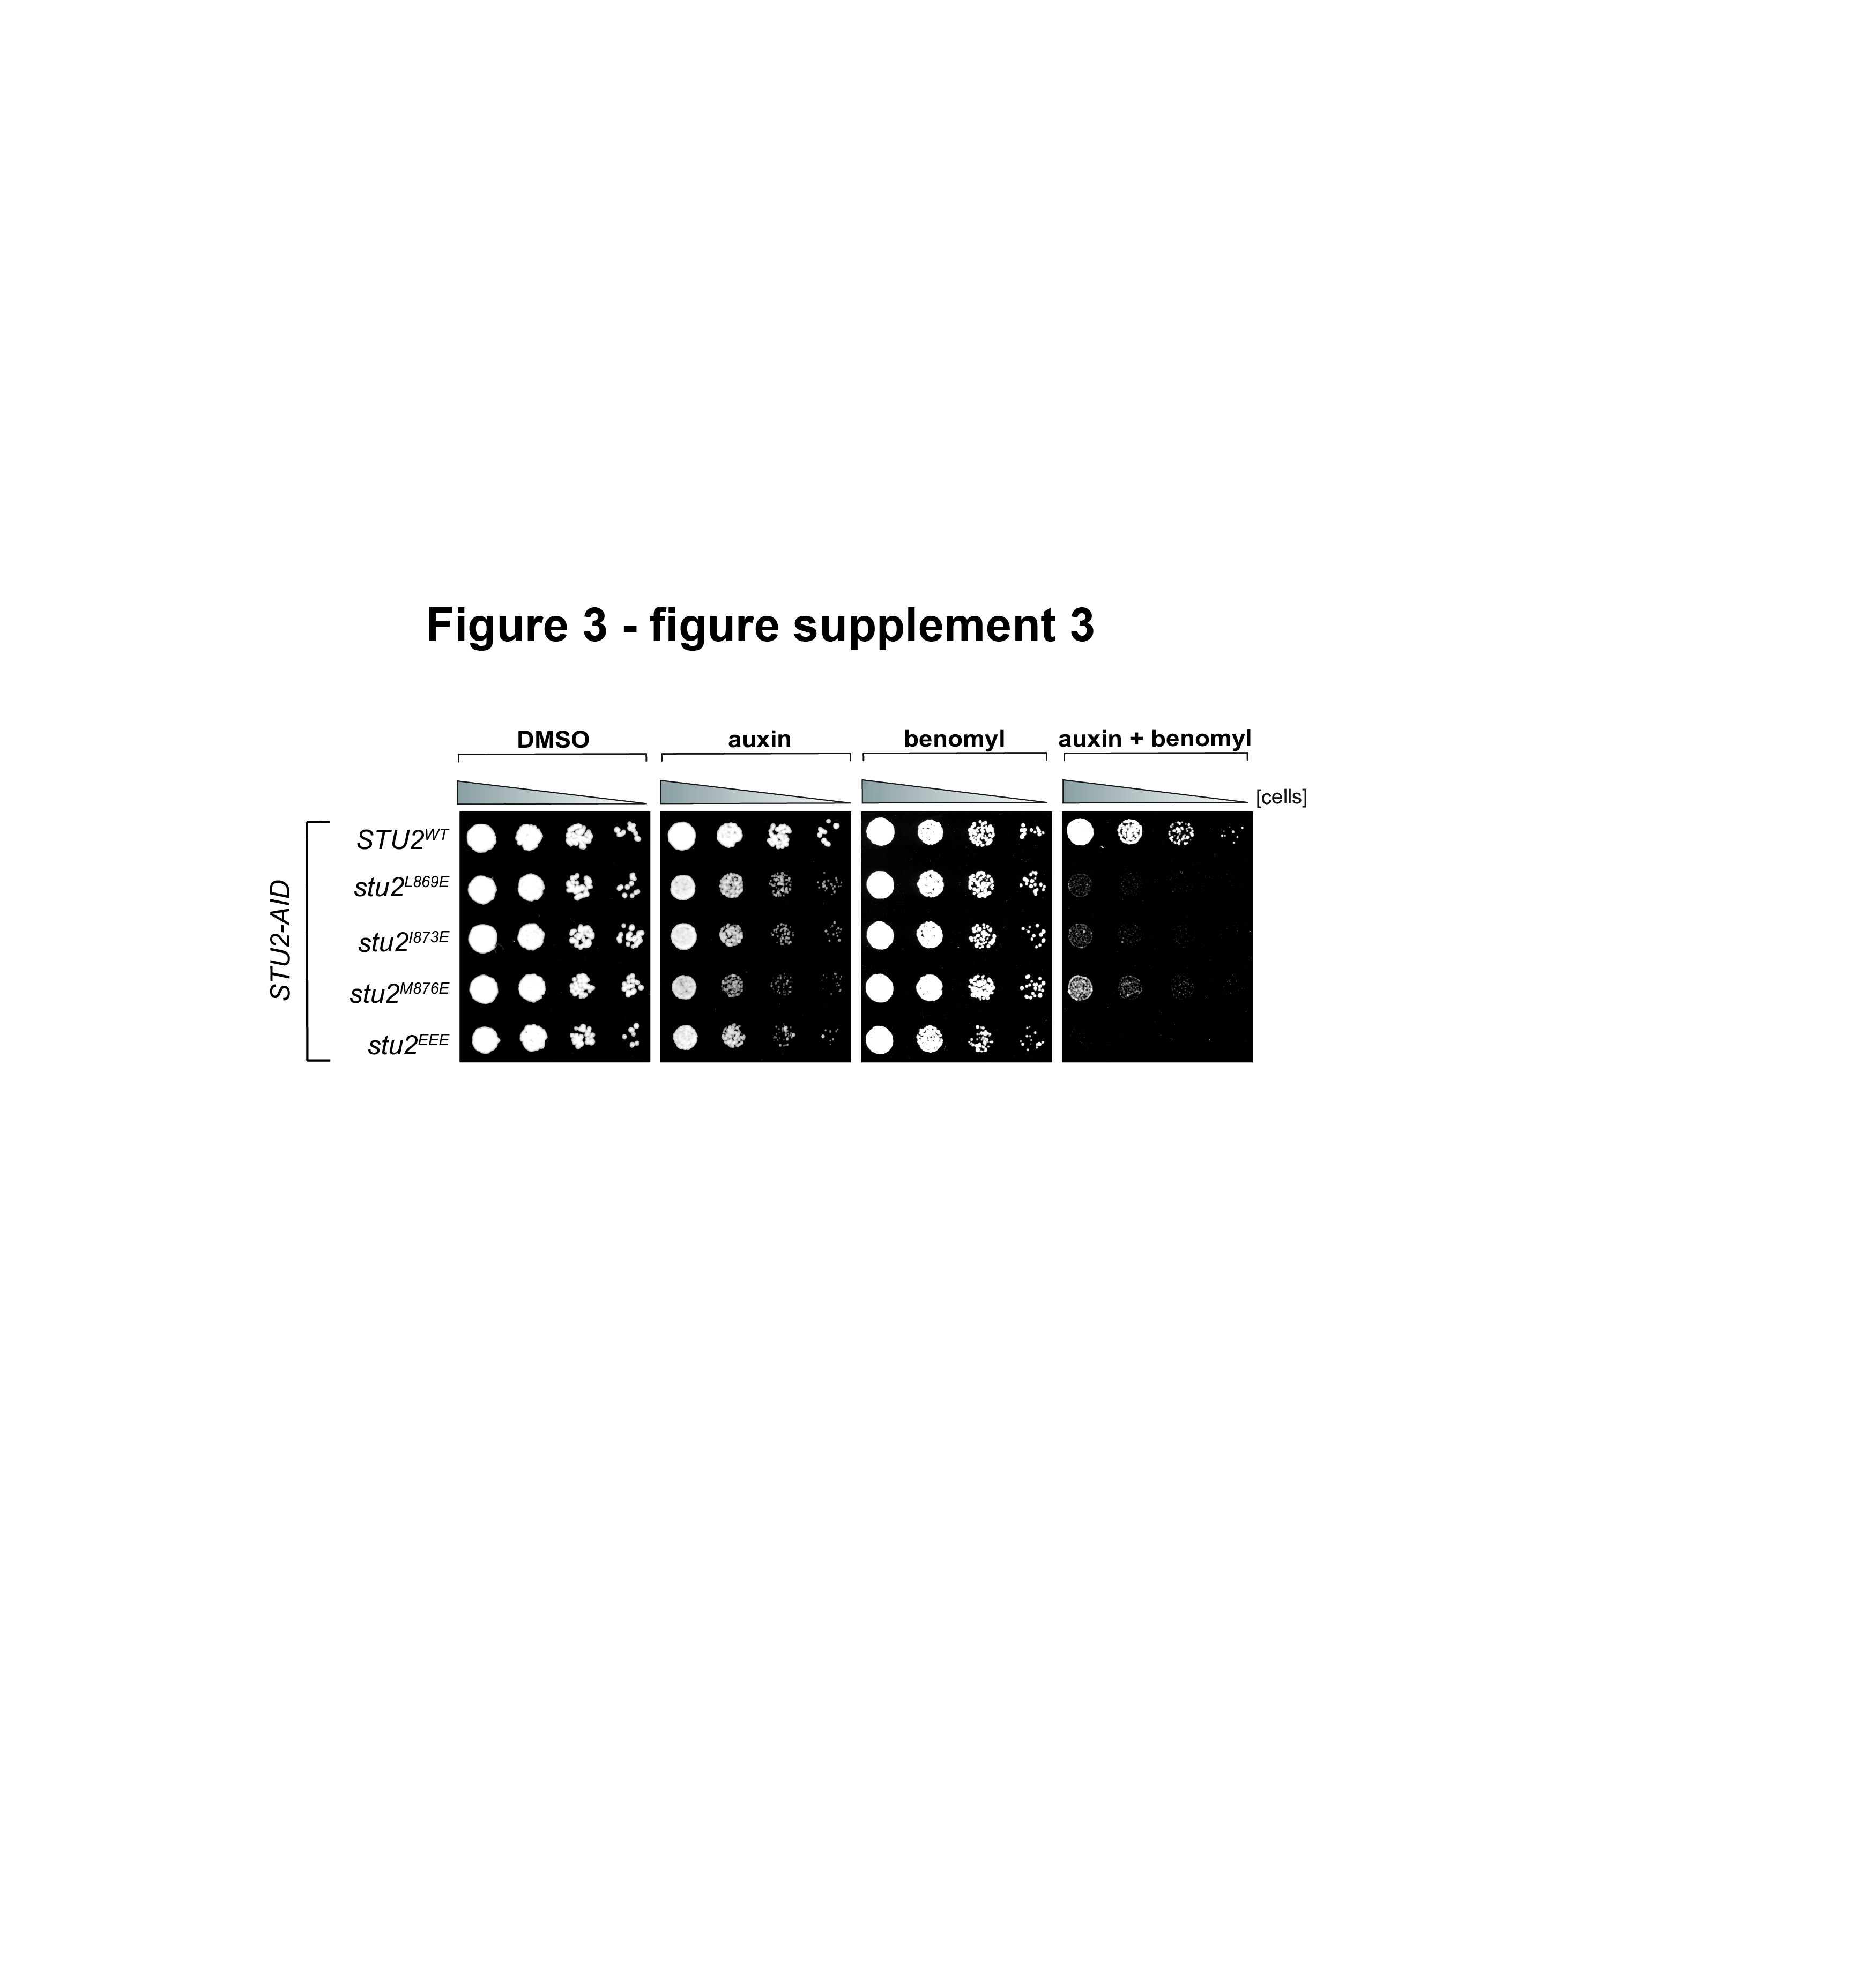

Supplement: supp [file elife-65389-supp-v1.zip › elife_poa_e65389_Figure_3_figure_supplement_3.tif]

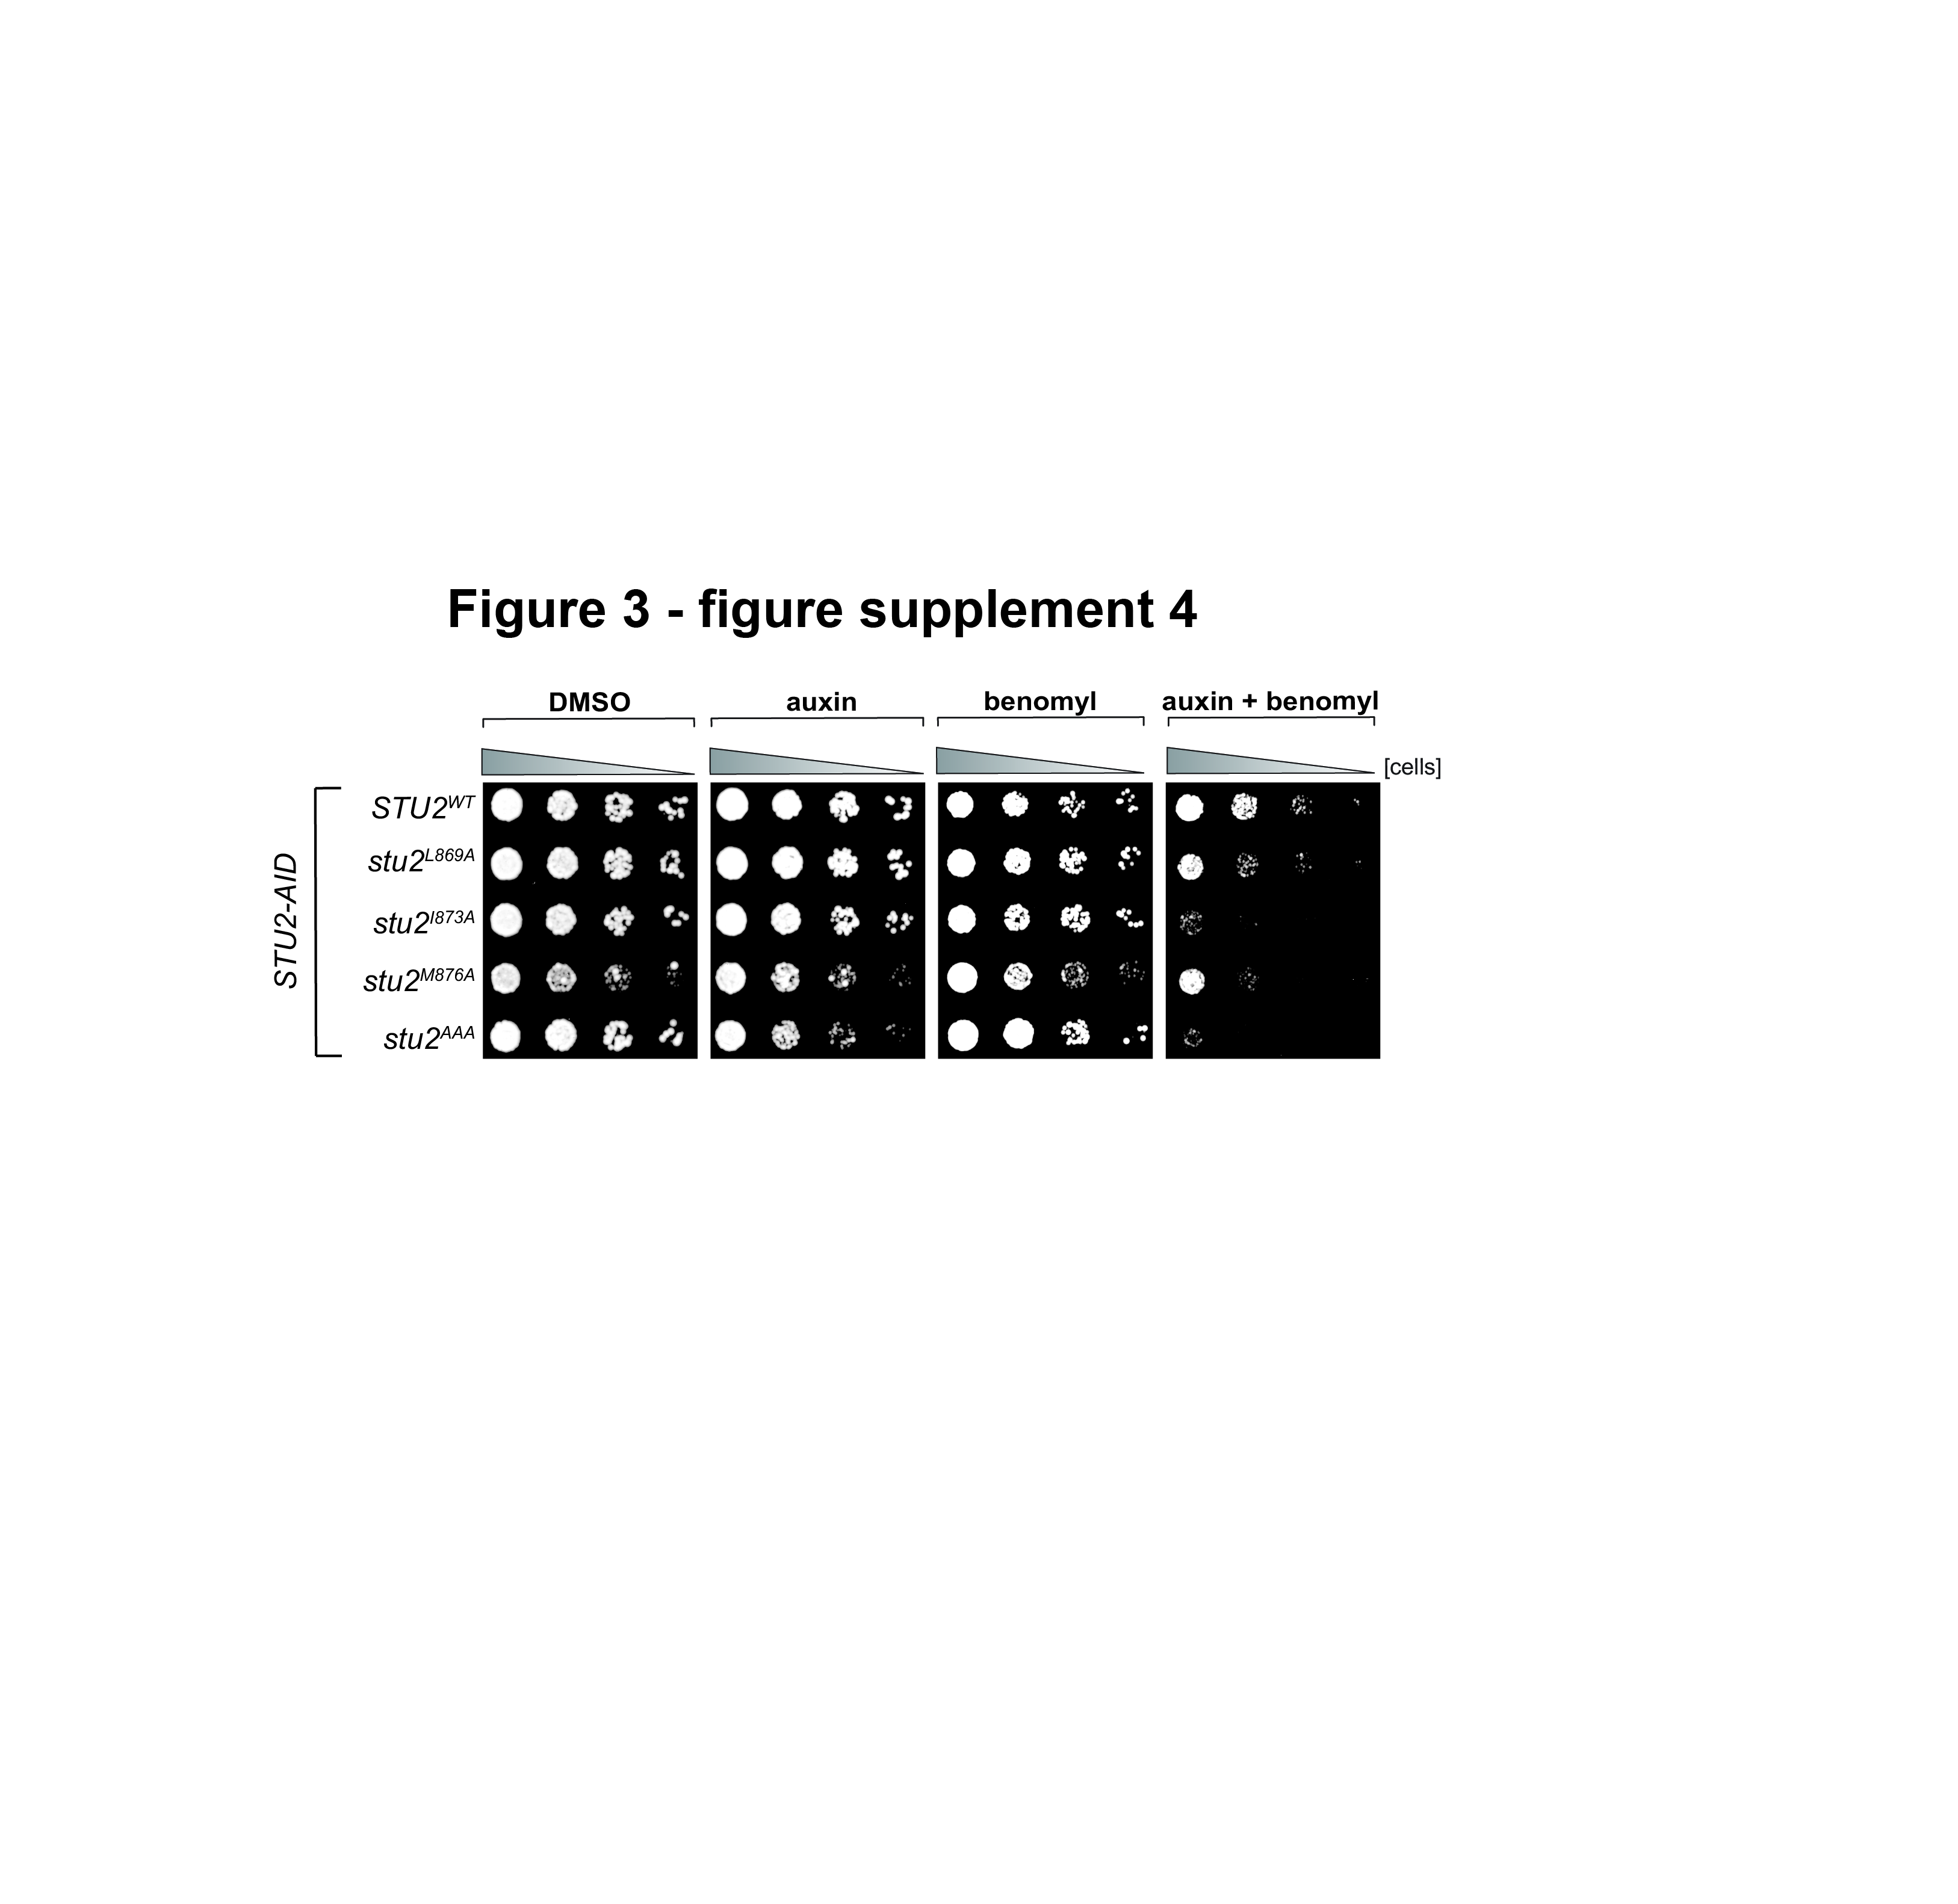

Supplement: supp [file elife-65389-supp-v1.zip › elife_poa_e65389_Figure_3_figure_supplement_4.tif]

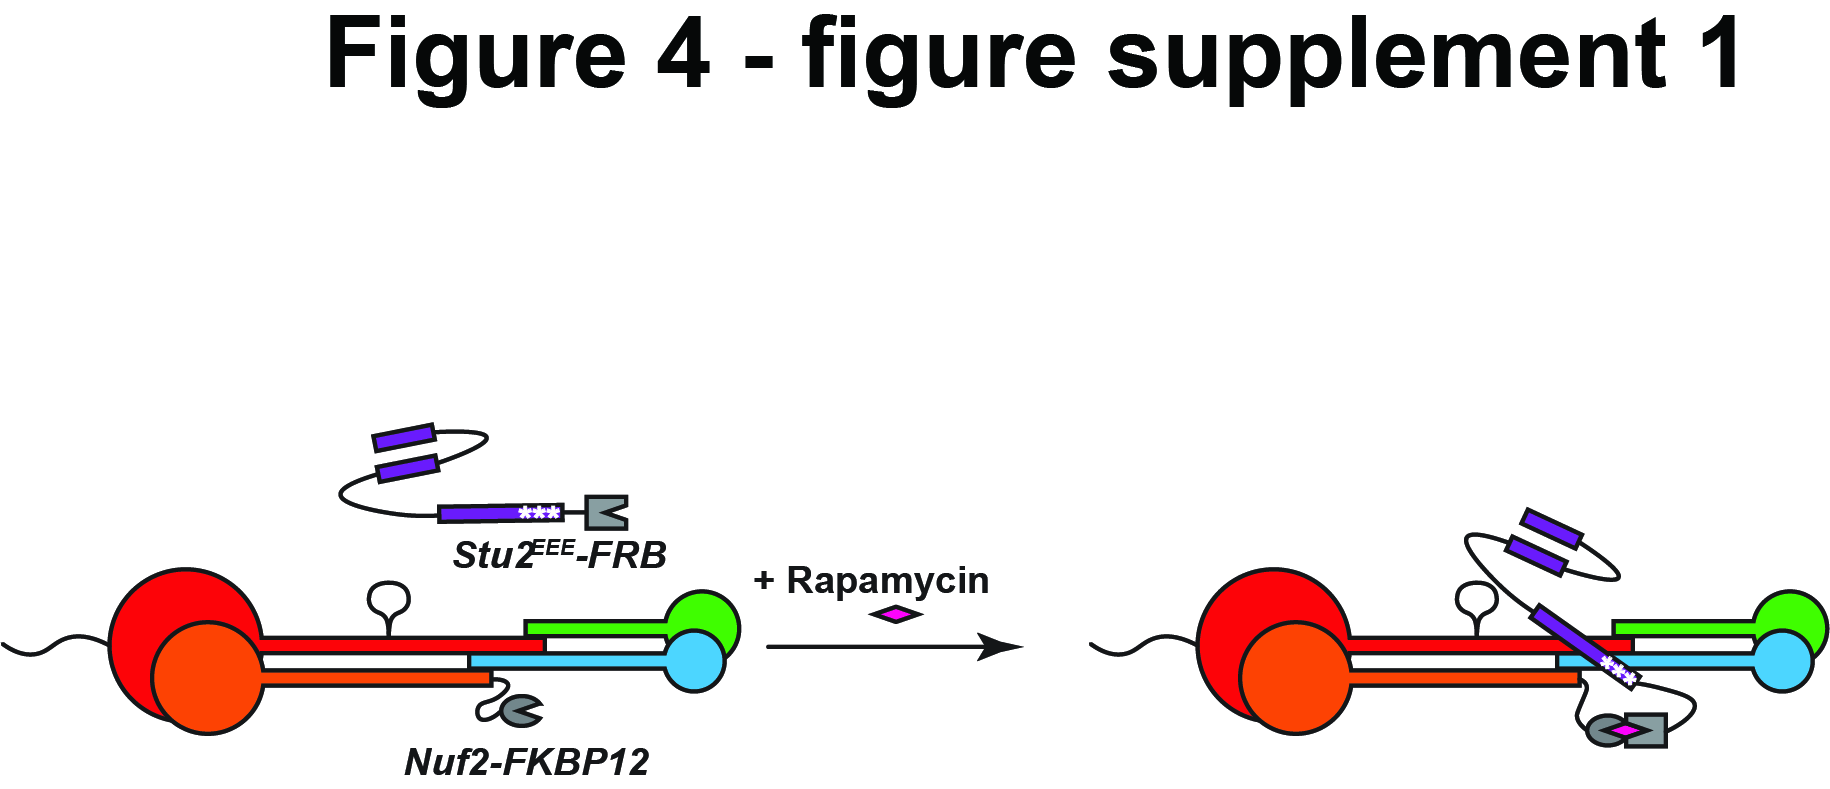

Supplement: supp [file elife-65389-supp-v1.zip › elife_poa_e65389_Figure_4_figure_supplement_1.tif]

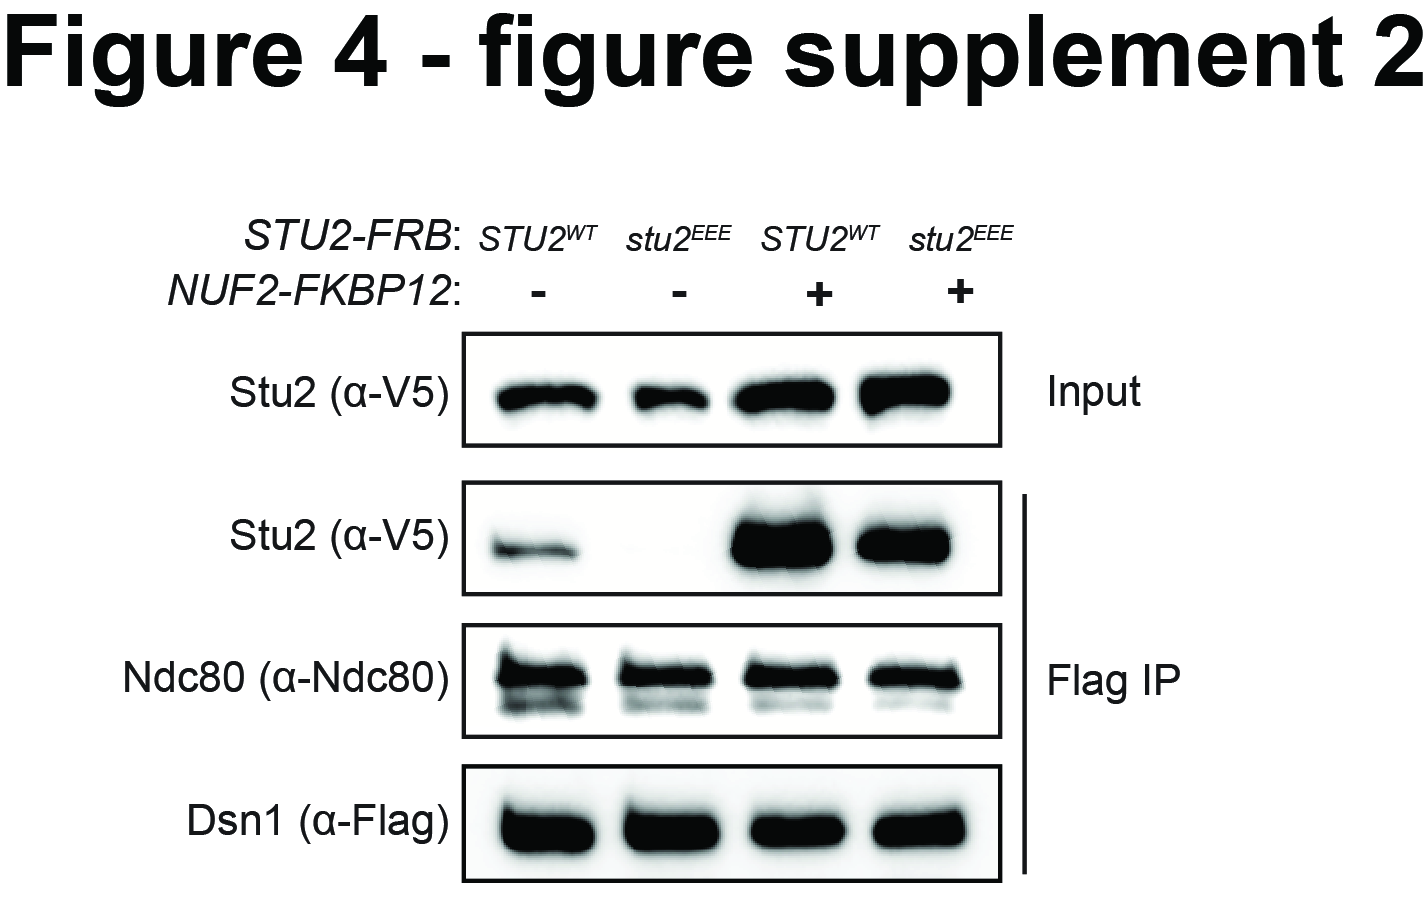

Supplement: supp [file elife-65389-supp-v1.zip › elife_poa_e65389_Figure_4_figure_supplement_2.tif]

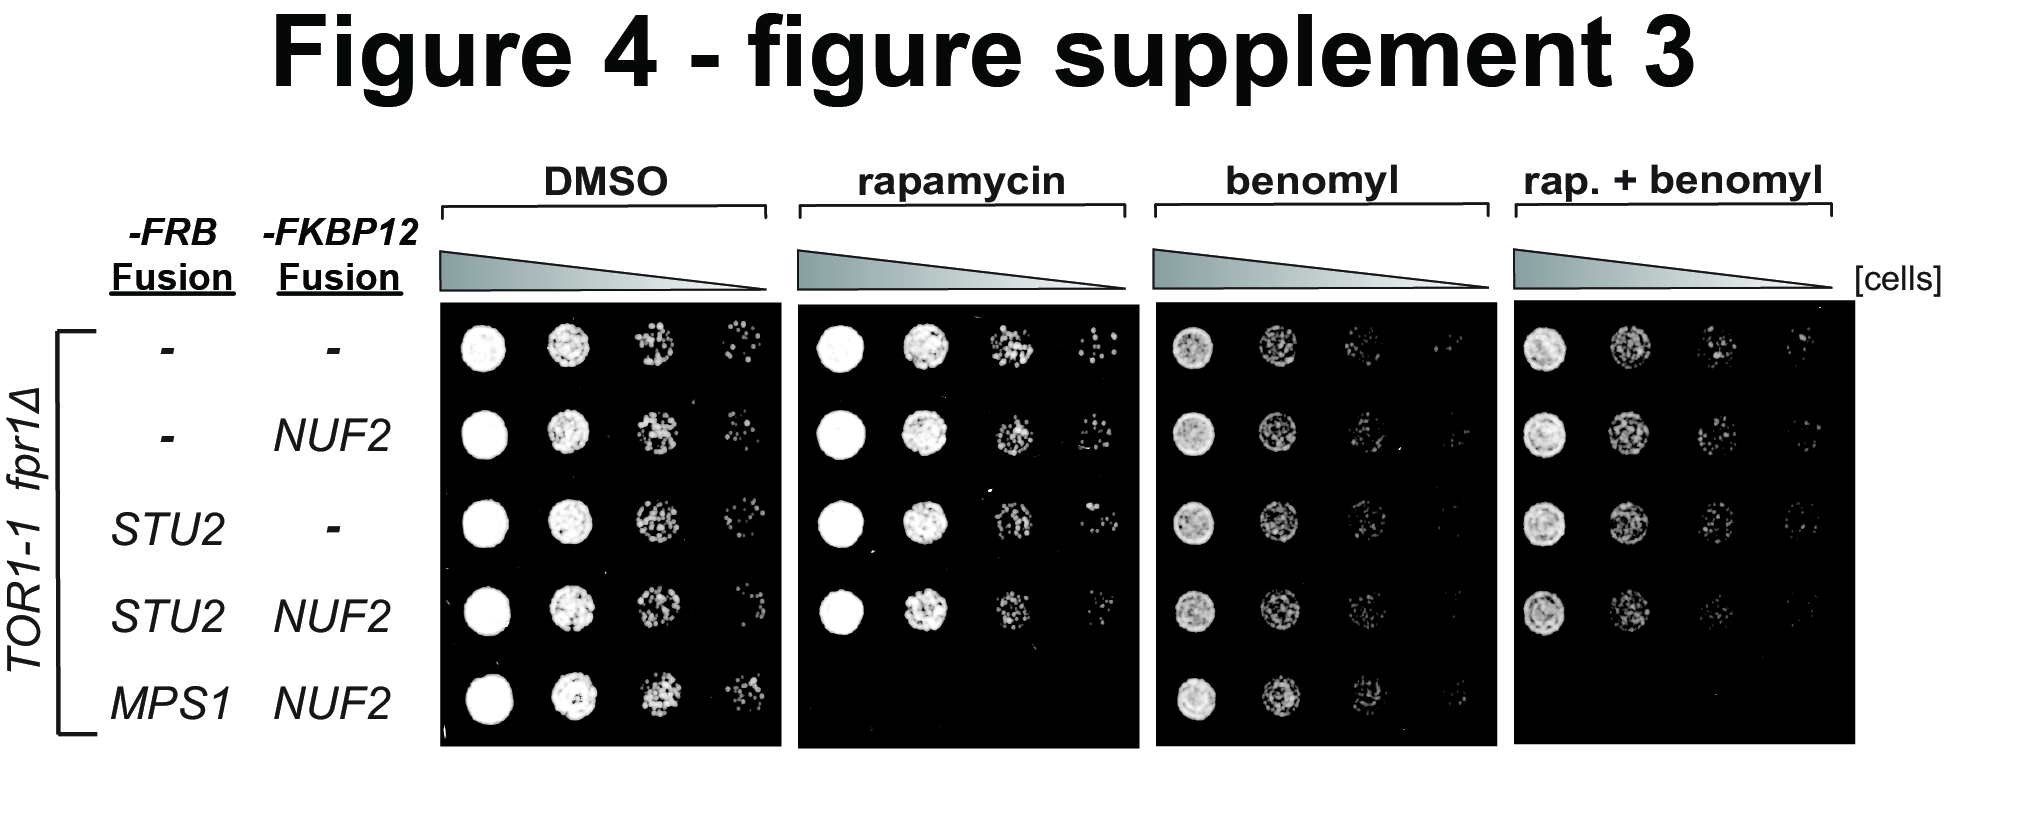

Supplement: supp [file elife-65389-supp-v1.zip › elife_poa_e65389_Figure_4_figure_supplement_3.tif]

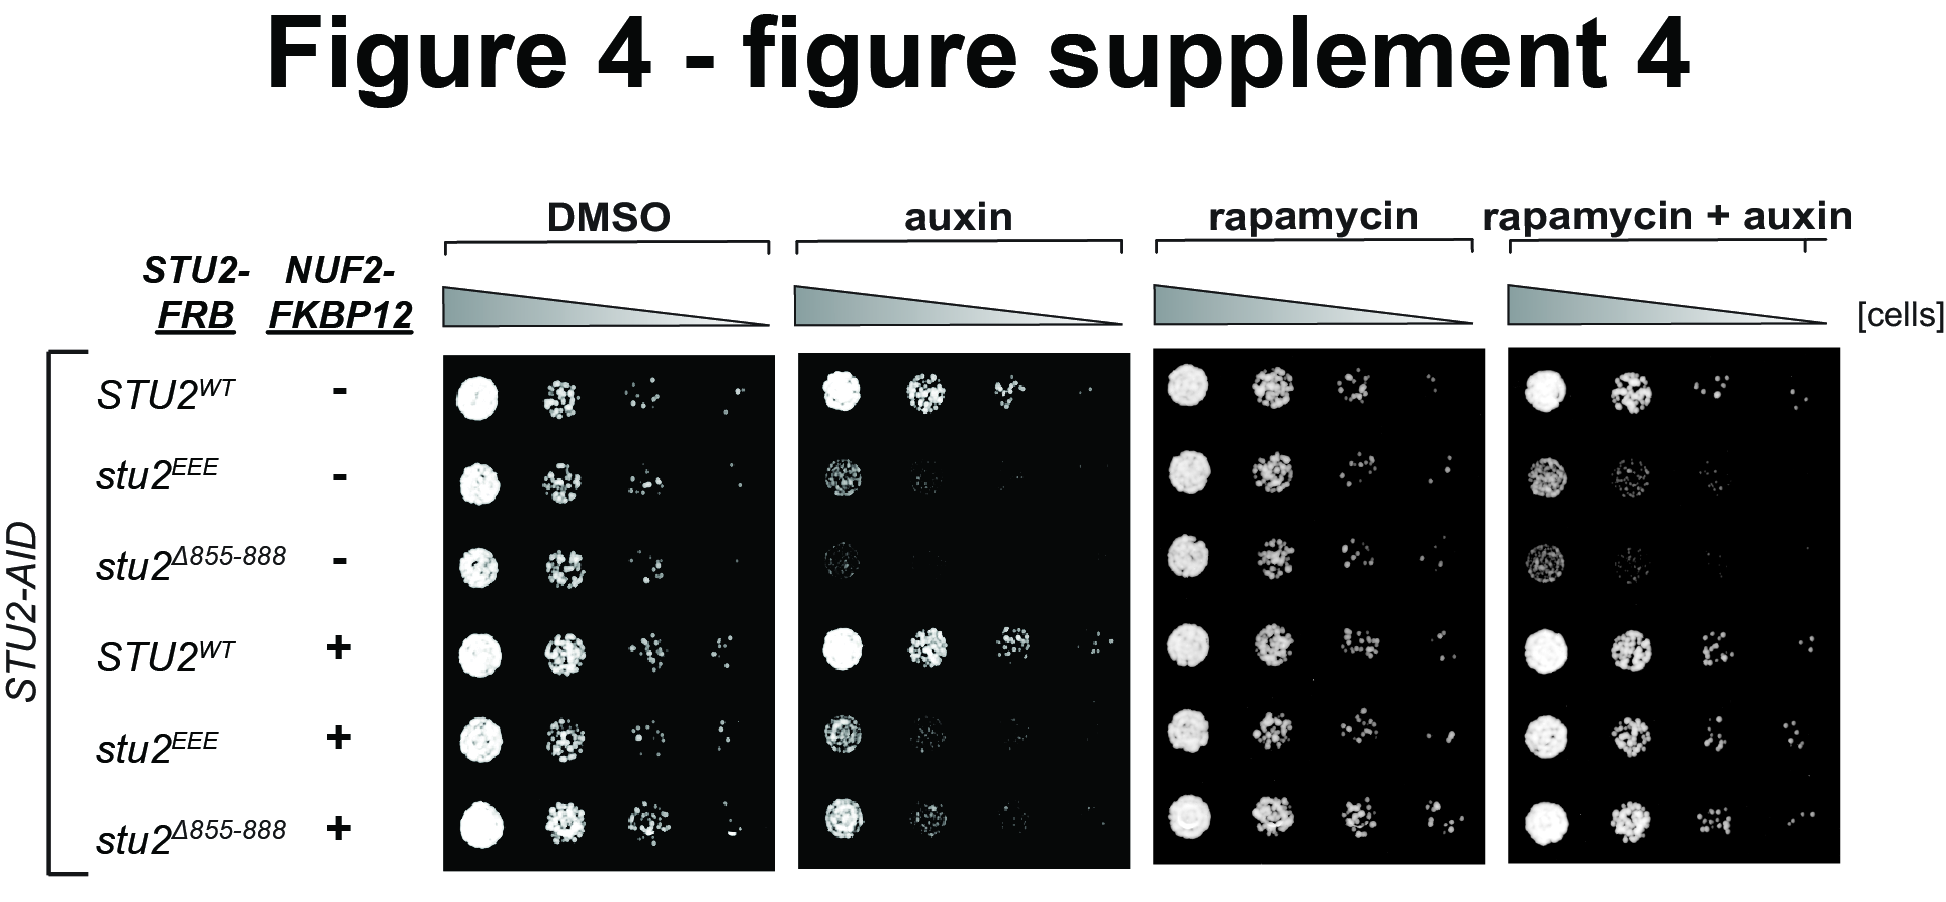

Supplement: supp [file elife-65389-supp-v1.zip › elife_poa_e65389_Figure_4_figure_supplement_4.tif]

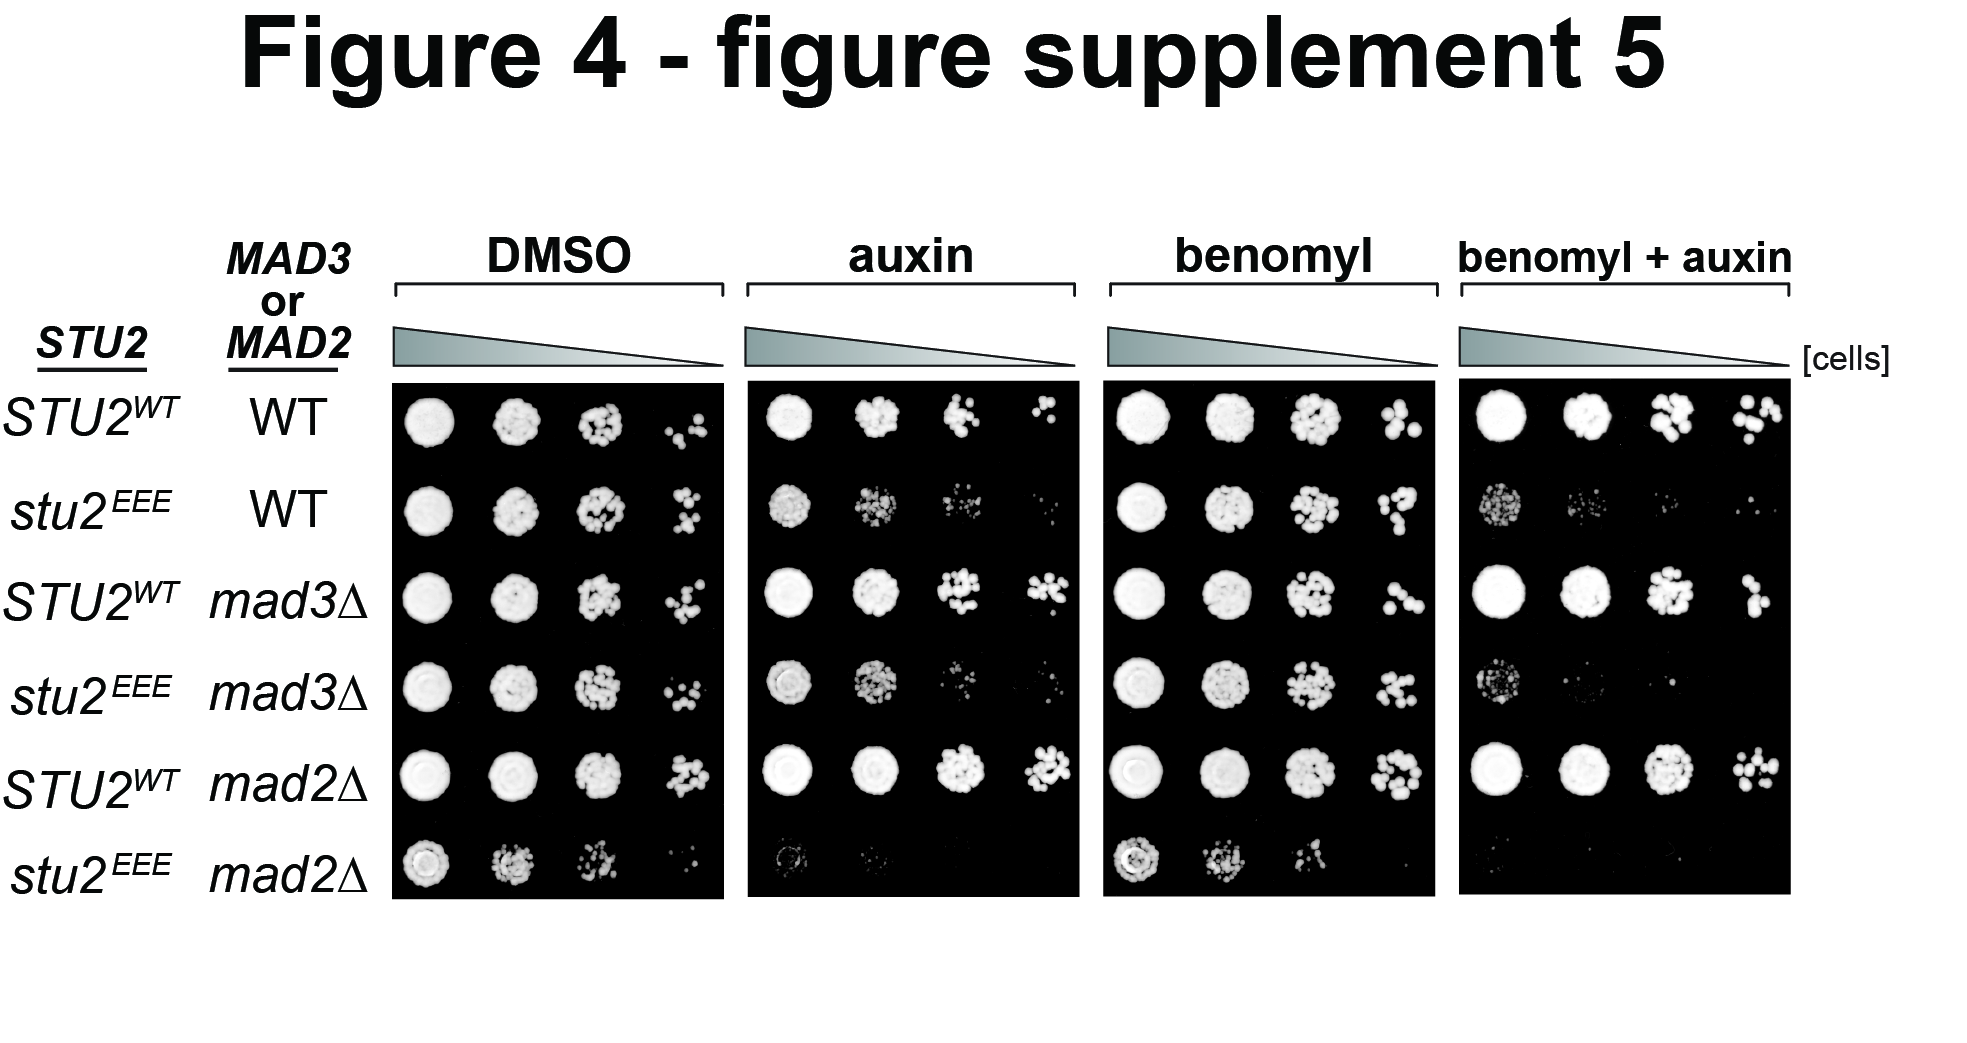

Supplement: supp [file elife-65389-supp-v1.zip › elife_poa_e65389_Figure_4_figure_supplement_5.tif]

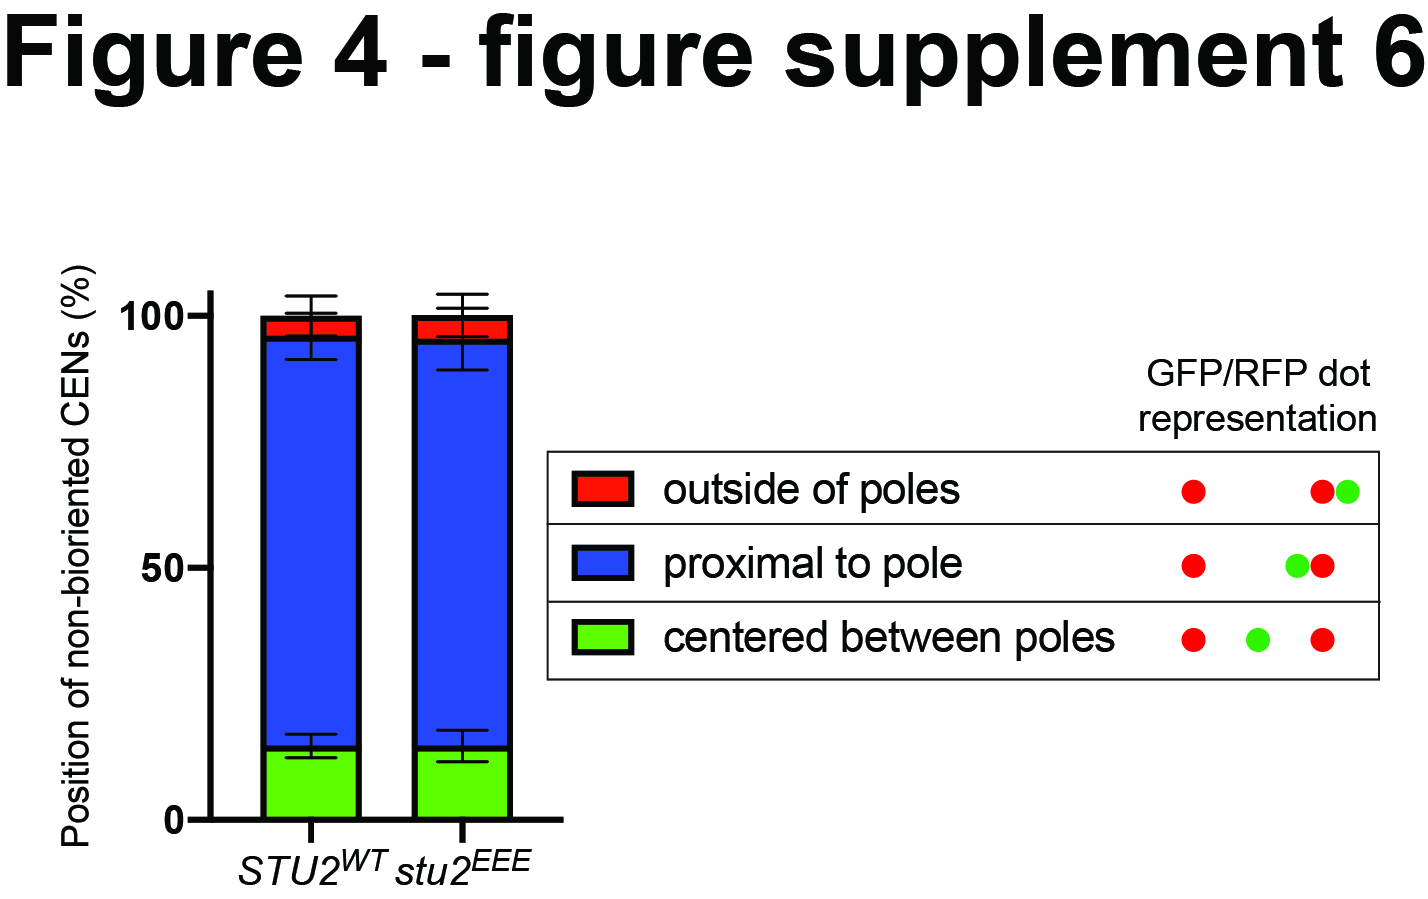

Supplement: supp [file elife-65389-supp-v1.zip › elife_poa_e65389_Figure_4_figure_supplement_6.tif]

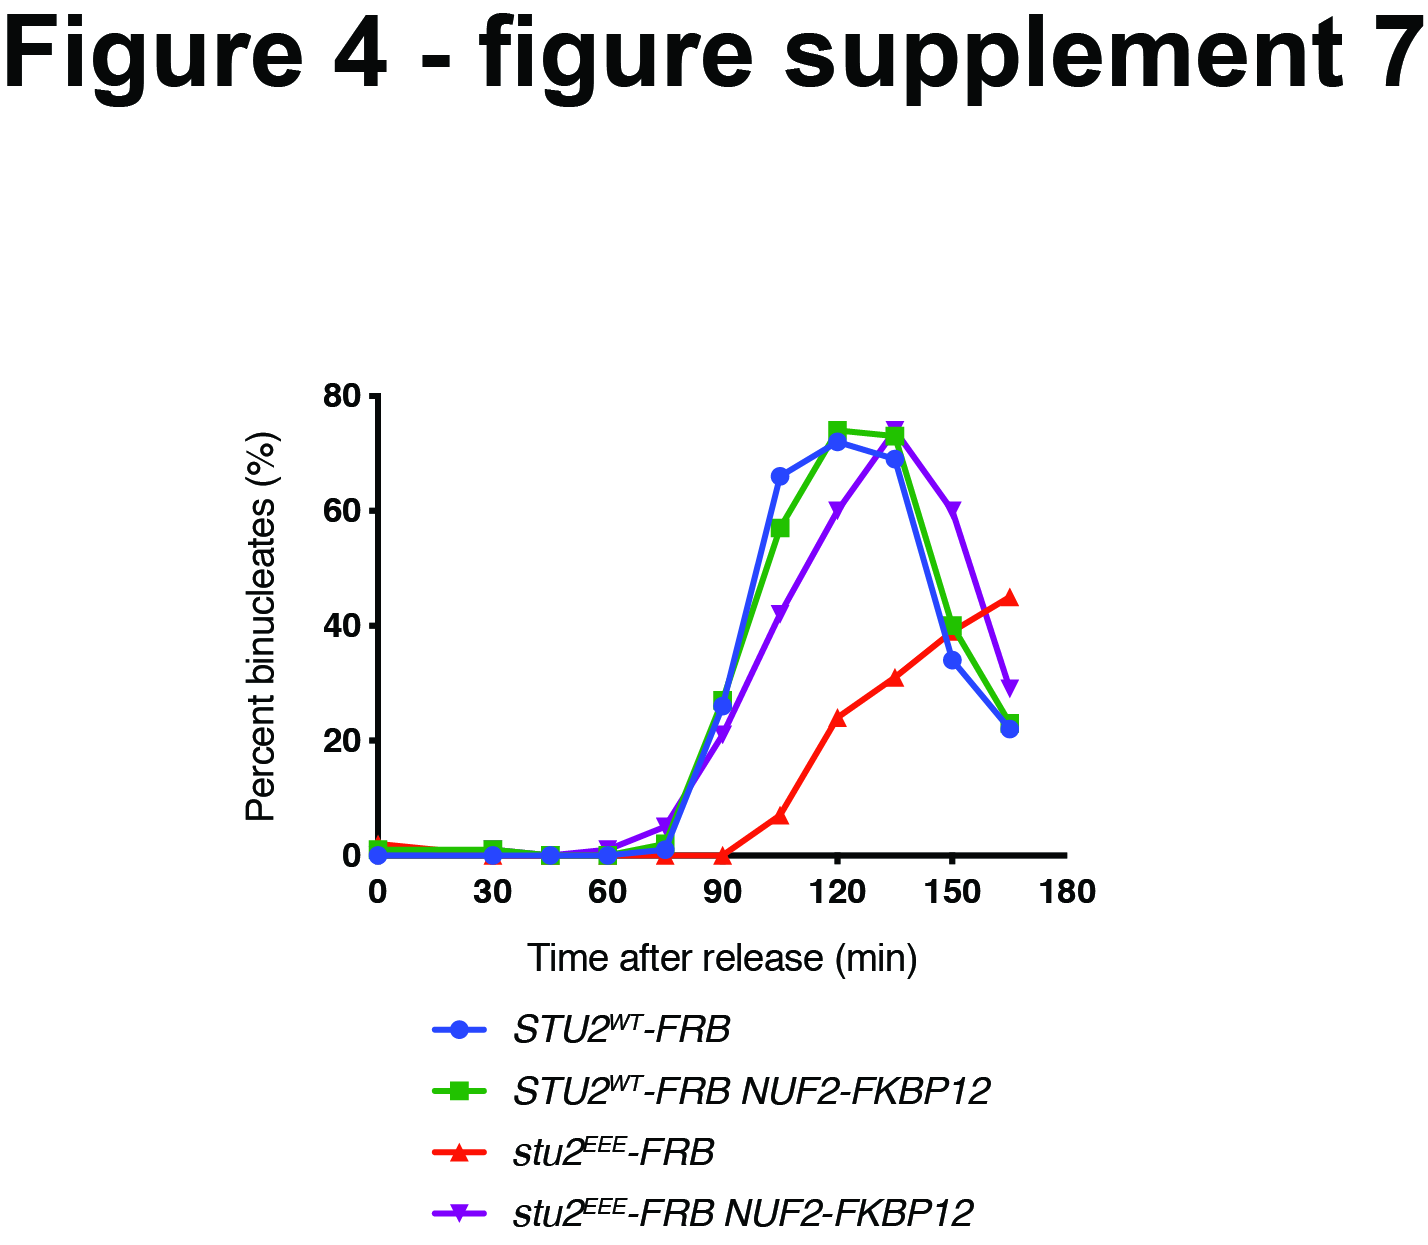

Supplement: supp [file elife-65389-supp-v1.zip › elife_poa_e65389_Figure_4_figure_supplement_7.tif]
